# Supplementary material
Source: PubMed Central journal article supplement (PMC7255641)
Supplement: NIHMS1590992-supplement-Supplemental_Material.pdf [file NIHMS1590992-supplement-Supplemental_Material.pdf]

# Supporting Information – Characterization of the Effect of Drug Metabolism on the Gas-Phase Structures of Drugs Using Ion Mobility-Mass Spectrometry

*Dylan H. Ross, Ryan P. Seguin, and Libin Xu\**

Department of Medicinal Chemistry, University of Washington, Seattle, WA 98195

Correspondence:

Libin Xu, Ph.D.

Department of Medicinal Chemistry

University of Washington

Tel: (206) 543-1080

Fax: (206) 685-3252

Email: [libinxu@uw.edu](mailto:libinxu@uw.edu)

# Contents

## 1 – Experimental Section

1.1 – Synthesis of Benzalkonium Chlorides (BACs) and  $\omega$ -OH Metabolites

1.2 – Ion Mobility-Mass Spectrometry Electrospray Conditions

1.3 – Scheme S1 – Computational Modeling Workflow

## 2 – Results and Discussion

2.1 –  $^1\text{H-NMR}$  and HRMS Characterization of Synthesized BACs and  $\omega$ -OH Metabolites

2.2 – Computational Modeling on Sodiated Adduct of Quercetin Glucuronide

## 3 – Tables and Figures

3.1 – Figure S1 – Initial Characterization of Midazolam Metabolites

3.2 – Table S1 – Experimental CCS Values for Drugs and Observed Metabolites

3.3 – Figure S2 – Expected Metabolites from Literature, Observed Metabolites, and

## Fragmentation Data for Drugs

3.4 – Figure S3 – Theoretical CCS of Sodiated Quercetin Glucuronide Isomers

## 4 – References

# 1 – Experimental Section

## 1.1 – Synthesis of Benzalkonium Chlorides (BACs) and $\omega$ -OH Metabolites

BACs were synthesized by nucleophilic coupling of N,N-dimethylbenzylamine with 1.4 equivalents of an alkyl chloride of the appropriate alkyl chain length in ethanol heated under reflux<sup>1</sup>. The corresponding  $\omega$ -hydroxy versions of each BAC were prepared in the same manner by substituting the alkyl chloride with the appropriate  $\omega$ -hydroxy alkyl chloride. Products were recrystallized from hot acetone and rinsed with cold diethyl ether. Chemical identities were confirmed by <sup>1</sup>H-NMR and/or high-resolution mass spectrometry (HRMS).

## 1.2 – Ion Mobility-Mass Spectrometry Electrospray Conditions

IM-MS analysis was performed on a Waters Synapt G2-Si HDMS (Waters Corp., Milford, MA) equipped with an electrospray ionization (ESI) source using nitrogen as the drift gas. ESI conditions were as follows: capillary, +2.5 kV; sampling cone, 40 V; source temperature, 100 °C; desolvation temperature, 250 °C; cone gas, 50 L/h; and desolvation gas, 600 L/h.

## 1.3 – Scheme S1 – Computational Modeling Workflow

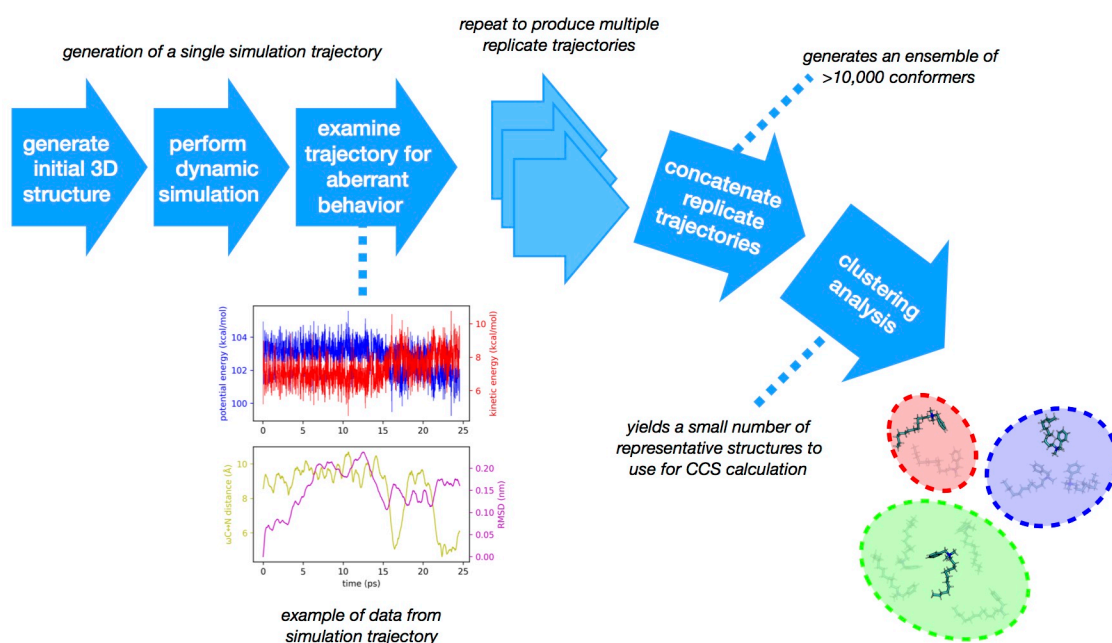

## 2 – Results and Discussion

### 2.1 – <sup>1</sup>H-NMR and HRMS Characterization of Synthesized BACs and ω-OH Metabolites

**C<sub>4</sub> BAC:** HRMS [M-Cl<sup>+</sup>] (C<sub>13</sub>H<sub>22</sub>N): *observed, 192.1747; theoretical: 192.1752.*

**C<sub>6</sub> BAC:** HRMS [M-Cl<sup>+</sup>] (C<sub>15</sub>H<sub>26</sub>N): *observed, 220.2063; theoretical: 220.2065.*

**C<sub>8</sub> BAC:** HRMS [M-Cl<sup>+</sup>] (C<sub>17</sub>H<sub>30</sub>N): *observed, 248.2375; theoretical: 248.2378.*

**C<sub>10</sub> BAC:** HRMS [M-Cl<sup>+</sup>] (C<sub>19</sub>H<sub>34</sub>N): *observed, 276.2694; theoretical: 276.2691.*

**ω-OH C<sub>4</sub> BAC:** HRMS [M-Cl<sup>+</sup>] (C<sub>13</sub>H<sub>22</sub>NO): *observed, 208.1694; theoretical: 208.1701.*

**ω-OH C<sub>6</sub> BAC:** HRMS [M-Cl<sup>+</sup>] (C<sub>15</sub>H<sub>26</sub>NO): *observed, 236.2010; theoretical: 236.2014.*

**ω-OH C<sub>8</sub> BAC:** HRMS [M-Cl<sup>+</sup>] (C<sub>17</sub>H<sub>30</sub>NO): *observed, 264.2327; theoretical: 264.2327.*

**ω-OH C<sub>10</sub> BAC:** <sup>1</sup>H-NMR (CDCl<sub>3</sub>, 500 MHz): 1.29 and 1.36 (br s, 12H), 1.56 (m, 2H), 1.81 (m, 2H), 3.30 (s, 6H), 3.53 (m, 2H), 3.64 (q, 2H, J = 6.1 Hz), 5.03 (s, 2H), 7.47 (m, 3H), 7.64 (d, 2H, J = 7.0 Hz); MS [M-Cl<sup>+</sup>] (C<sub>19</sub>H<sub>34</sub>NO): *observed, 292.2639; theoretical: 292.2640.*

### 2.2 – Computational Modeling on Sodiated Adduct of Quercetin Glucuronide

Both protonated and sodiated MS adducts of quercetin glucuronide displayed bimodal ATDs (Figure S1A), indicating conformational heterogeneity and/or isomerism. Sodiated adducts of all potential positional isomers of quercetin glucuronide (3-, 3'-, 4'-, 5-, 7-) were modeled using the same computational methodology as was applied to the protonated isomers. Representative minimum energy structures are presented in Figure S1B, and their corresponding theoretical CCS values in Figure S1C (measured values as dotted lines). The theoretical CCS values follow the same trend as was observed for the protonated isomers: the higher CCS peak likely corresponds to the 7-isomer (due to lack of formation of the 5-isomer in human hepatic metabolism<sup>2</sup>) while the lower CCS peak likely has contributions from the 3-, 3'-, and/or 4'-isomers.

### 3 – Tables and Figures

#### 3.1 – Figure S1 – Initial Characterization of Midazolam Metabolites

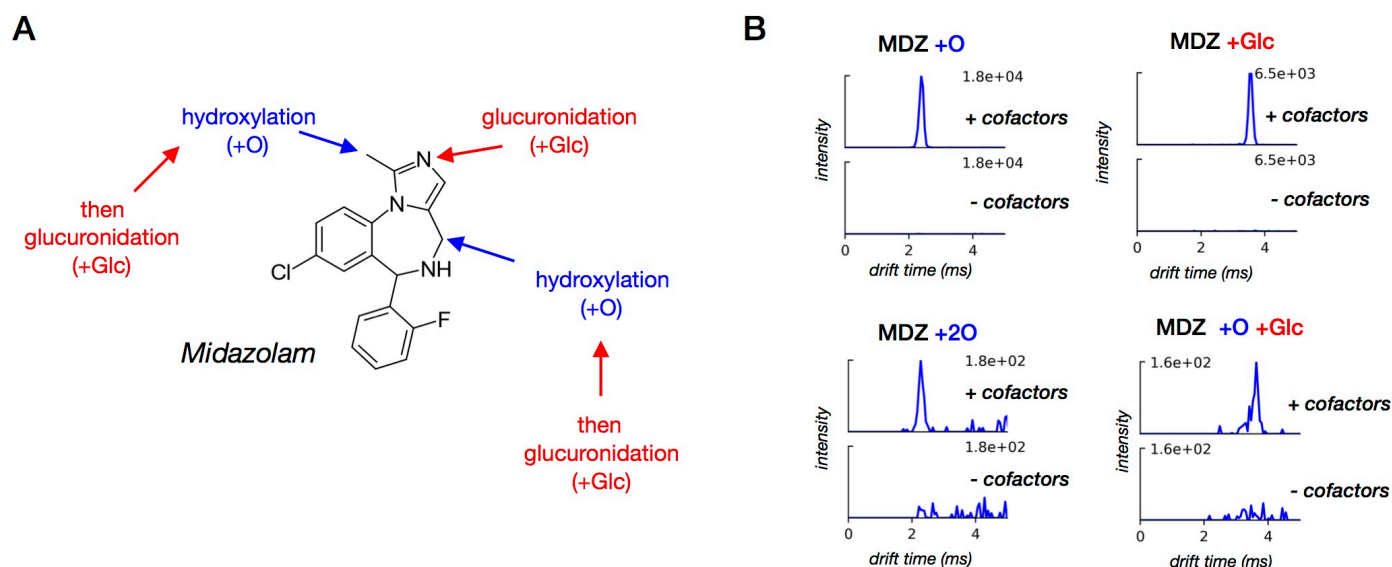

**A** Expected metabolism for midazolam<sup>3,4</sup> (MDZ). **B** Arrival time distributions (ATDs) for observed primary and secondary metabolites of MDZ showing cofactor-dependent formation.

#### 3.2 – Table S1 – Experimental CCS Values for Drugs and Observed Metabolites

| compound                  | metabolite                            | adduct              | m/z      | CCS (Å <sup>2</sup> ) | CCS RSD (%) | Compaction factor (C) |
|---------------------------|---------------------------------------|---------------------|----------|-----------------------|-------------|-----------------------|
| <b>C<sub>4</sub> BAC</b>  |                                       | [M] <sup>+</sup>    | 192.1838 | 144.96                | 0.52        |                       |
| <b>C<sub>4</sub> BAC</b>  | ω-OH                                  | [M] <sup>+</sup>    | 208.1795 | 148.19                | 0.22        | 1.032                 |
| <b>C<sub>6</sub> BAC</b>  |                                       | [M] <sup>+</sup>    | 220.2167 | 157.07                | 0.51        |                       |
| <b>C<sub>6</sub> BAC</b>  | ω-OH                                  | [M] <sup>+</sup>    | 236.2128 | 158.92                | 0.26        | 1.036                 |
| <b>C<sub>8</sub> BAC</b>  |                                       | [M] <sup>+</sup>    | 248.2505 | 170.09                | 0.55        |                       |
| <b>C<sub>8</sub> BAC</b>  | ω-OH                                  | [M] <sup>+</sup>    | 264.2128 | 170.14                | 0.31        | 1.042                 |
| <b>C<sub>10</sub> BAC</b> |                                       | [M] <sup>+</sup>    | 276.2869 | 182.24                | 0.60        |                       |
| <b>C<sub>10</sub> BAC</b> | ω-OH                                  | [M] <sup>+</sup>    | 292.2815 | 178.99                | 0.23        | 1.057                 |
| <b>C<sub>12</sub> BAC</b> |                                       | [M] <sup>+</sup>    | 304.3187 | 193.19                | 0.21        |                       |
| <b>C<sub>12</sub> BAC</b> | ω-OH                                  | [M] <sup>+</sup>    | 320.3119 | 187.55                | 0.20        | 1.066                 |
| <b>C<sub>14</sub> BAC</b> |                                       | [M] <sup>+</sup>    | 332.3427 | 203.67                | 0.27        |                       |
| <b>C<sub>14</sub> BAC</b> | ω-OH                                  | [M] <sup>+</sup>    | 348.3444 | 196.33                | 0.24        | 1.070                 |
| <b>C<sub>16</sub> BAC</b> |                                       | [M] <sup>+</sup>    | 360.3843 | 212.76                | 0.16        |                       |
| <b>C<sub>16</sub> BAC</b> | ω-OH                                  | [M] <sup>+</sup>    | 376.3800 | 205.00                | 0.53        | 1.068                 |
| <b>amlodipine</b>         |                                       | [M+H] <sup>+</sup>  | 409.1586 | 188.14                | 0.53        |                       |
| <b>amlodipine</b>         |                                       | [M+Na] <sup>+</sup> | 431.1457 | 197.21                | 0.24        |                       |
| <b>amlodipine</b>         | -2H                                   | [M+H] <sup>+</sup>  | 407.1475 | 187.24                | 0.04        | 1.002                 |
| <b>amlodipine</b>         | -2H, -Me                              | [M+H] <sup>+</sup>  | 393.1390 | 182.61                | 0.11        | 1.003                 |
| <b>amlodipine</b>         | -2H, -Et                              | [M+H] <sup>+</sup>  | 379.1376 | 183.95                | 0.10        | 0.972                 |
| <b>amlodipine</b>         | -2H, -C <sub>2</sub> H <sub>6</sub> N | [M+H] <sup>+</sup>  | 363.1180 | 177.84                | 0.08        | 0.977                 |
| <b>amlodipine</b>         | -Et                                   | [M+H] <sup>+</sup>  | 381.0955 | 172.06                | 0.30        | 1.043                 |
| <b>amlodipine</b>         | -Et                                   | [M+Na] <sup>+</sup> | 403.1226 | 207.14                | 0.20        | 0.910                 |
| <b>bupropion</b>          |                                       | [M+H] <sup>+</sup>  | 240.1217 | 157.37                | 0.24        |                       |

|                           |           |                                       |          |        |      |       |
|---------------------------|-----------|---------------------------------------|----------|--------|------|-------|
| <b>bupropion</b>          | +2H       | [( <sup>37</sup> Cl)M+H] <sup>+</sup> | 244.1346 | 156.07 | 0.31 | 1.020 |
| <b>chlorpromazine</b>     |           | [M+H] <sup>+</sup>                    | 319.1169 | 169.58 | 0.32 |       |
| <b>chlorpromazine</b>     |           | [M+Na] <sup>+</sup>                   | 341.1305 | 170.83 | 0.42 |       |
| <b>chlorpromazine</b>     | -Me       | [M+H] <sup>+</sup>                    | 305.0947 | 167.66 | 0.47 | 0.982 |
| <b>chlorpromazine</b>     | +O        | [M+H] <sup>+</sup>                    | 335.1066 | 170.74 | 0.55 | 1.026 |
| <b>clomifene</b>          |           | [M+H] <sup>+</sup>                    | 406.2054 | 203.68 | 0.60 |       |
| <b>clomifene</b>          | +O        | [M+H] <sup>+</sup>                    | 422.1923 | 209.10 | 0.11 | 0.999 |
| <b>clomifene</b>          | -Et       | [M+H] <sup>+</sup>                    | 378.1691 | 197.10 | 0.11 | 0.985 |
| <b>clomifene</b>          | +O, -Et   | [M+H] <sup>+</sup>                    | 394.1640 | 200.20 | 0.12 | 0.997 |
| <b>clopidogrel</b>        |           | [M+H] <sup>+</sup>                    | 322.0720 | 167.32 | 0.27 |       |
| <b>clopidogrel</b>        | +O        | [M+H] <sup>+</sup>                    | 338.0700 | 172.49 | 0.26 | 1.002 |
| <b>clozapine</b>          |           | [M+H] <sup>+</sup>                    | 327.1458 | 177.67 | 0.27 |       |
| <b>clozapine</b>          |           | [M+Na] <sup>+</sup>                   | 349.1254 | 178.03 | 0.17 |       |
| <b>clozapine</b>          | +O        | [M+H] <sup>+</sup>                    | 343.1388 | 179.97 | 0.23 | 1.019 |
| <b>clozapine</b>          | +GSH      | [M+H] <sup>+</sup>                    | 632.2207 | 238.91 | 0.11 | 1.154 |
| <b>dextromethorphan</b>   |           | [M+H] <sup>+</sup>                    | 272.2093 | 164.54 | 0.38 |       |
| <b>dextromethorphan</b>   |           | [M+Na] <sup>+</sup>                   | 294.2091 | 174.13 | 0.91 |       |
| <b>dextromethorphan</b>   | -Me       | [M+H] <sup>+</sup>                    | 258.1915 | 159.93 | 0.43 | 0.993 |
| <b>diclofenac</b>         |           | [M+H] <sup>+</sup>                    | 296.0769 | 159.05 | 0.45 |       |
| <b>diclofenac</b>         |           | [M+Na] <sup>+</sup>                   | 318.0157 | 159.32 | 1.19 |       |
| <b>diclofenac</b>         | +O        | [M+Na] <sup>+</sup>                   | 334.0125 | 167.11 | 1.07 | 0.985 |
| <b>diclofenac</b>         | +Glc      | [M+Na] <sup>+</sup>                   | 494.0488 | 200.79 | 0.50 | 1.064 |
| <b>diclofenac</b>         | +O, +Glc  | [M+Na] <sup>+</sup>                   | 510.0204 | 202.54 | 0.38 | 1.078 |
| <b>midazolam</b>          |           | [M+H] <sup>+</sup>                    | 326.0963 | 171.68 | 0.32 |       |
| <b>midazolam</b>          | +O        | [M+H] <sup>+</sup>                    | 342.0881 | 175.13 | 0.26 | 1.012 |
| <b>midazolam</b>          | +Glc      | [M] <sup>+</sup>                      | 502.1203 | 211.85 | 1.45 | 1.081 |
| <b>progesterone</b>       |           | [M+H] <sup>+</sup>                    | 315.2368 | 178.43 | 0.26 |       |
| <b>progesterone</b>       |           | [M+Na] <sup>+</sup>                   | 337.2199 | 202.53 | 0.16 |       |
| <b>progesterone</b>       |           | [M+H-H <sub>2</sub> O] <sup>+</sup>   | 297.2274 | 172.96 | 0.58 |       |
| <b>progesterone</b>       | +O        | [M+H] <sup>+</sup>                    | 331.2334 | 181.35 | 0.15 | 1.017 |
| <b>progesterone</b>       | +2H       | [M+H] <sup>+</sup>                    | 317.2529 | 178.82 | 0.17 | 1.002 |
| <b>progesterone</b>       | +4H, +Glc | [M+H] <sup>+</sup>                    | 495.2497 | 215.41 | 0.22 | 1.119 |
| <b>quercetin</b>          |           | [M+H] <sup>+</sup>                    | 303.0568 | 162.96 | 0.44 |       |
| <b>quercetin</b>          |           | [M+Na] <sup>+</sup>                   | 325.1876 | 173.17 | 1.16 |       |
| <b>quercetin (peak 1)</b> | +Glc      | [M+H] <sup>+</sup>                    | 479.0892 | 204.10 | 0.20 | 1.084 |
| <b>quercetin (peak 2)</b> | +Glc      | [M+H] <sup>+</sup>                    | 479.0892 | 209.87 | 0.02 | 1.054 |
| <b>quercetin (peak 1)</b> | +Glc      | [M+Na] <sup>+</sup>                   | 501.0968 | 207.30 | 0.21 | 1.114 |
| <b>quercetin (peak 2)</b> | +Glc      | [M+Na] <sup>+</sup>                   | 501.0968 | 216.62 | 0.43 | 1.067 |
| <b>quinidine</b>          |           | [M+H] <sup>+</sup>                    | 325.2060 | 174.69 | 0.29 |       |
| <b>quinidine</b>          |           | [M+Na] <sup>+</sup>                   | 347.1915 | 177.11 | 0.30 |       |
| <b>quinidine</b>          | +O        | [M+H] <sup>+</sup>                    | 341.1923 | 177.48 | 0.31 | 1.016 |
| <b>terfenadine</b>        |           | [M+H] <sup>+</sup>                    | 472.3376 | 227.04 | 0.13 |       |
| <b>terfenadine</b>        |           | [M+Na] <sup>+</sup>                   | 494.3174 | 223.48 | 0.07 |       |
| <b>terfenadine</b>        | +O        | [M+H] <sup>+</sup>                    | 488.3268 | 222.82 | 0.12 | 1.042 |
| <b>thioridazine</b>       |           | [M+H] <sup>+</sup>                    | 371.1743 | 184.60 | 0.09 |       |
| <b>thioridazine</b>       |           | [M+Na] <sup>+</sup>                   | 393.1823 | 188.74 | 0.13 |       |
| <b>thioridazine</b>       | +O        | [M+H] <sup>+</sup>                    | 387.1683 | 185.91 | 0.36 | 1.021 |
| <b>thioridazine</b>       | -Me       | [M+H] <sup>+</sup>                    | 357.1578 | 184.20 | 0.23 | 0.977 |
| <b>thioridazine</b>       | +O, -Me   | [M+H] <sup>+</sup>                    | 373.1677 | 184.83 | 0.16 | 1.002 |
| <b>thioridazine</b>       | +2O       | [M+H] <sup>+</sup>                    | 403.1605 | 190.50 | 0.19 | 1.024 |
| <b>thioridazine</b>       | +2O, -Me  | [M+H] <sup>+</sup>                    | 389.1668 | 186.11 | 0.35 | 1.024 |
| <b>triclosan</b>          |           | [M+H] <sup>+</sup>                    | 288.9481 | 153.08 | 0.30 |       |
| <b>triclosan</b>          |           | [M+Na] <sup>+</sup>                   | 310.9798 | 163.04 | 0.28 |       |
| <b>triclosan</b>          | +Glc      | [M+H] <sup>+</sup>                    | 464.9557 | 179.03 | 0.28 | 1.174 |
| <b>triclosan</b>          | +O, +Glc  | [M+Na] <sup>+</sup>                   | 502.9555 | 203.88 | 0.10 | 1.102 |

### 3.3 – Figure S2 – Expected Metabolites from Literature, Observed Metabolites, and Fragmentation

#### Data for Drugs

A

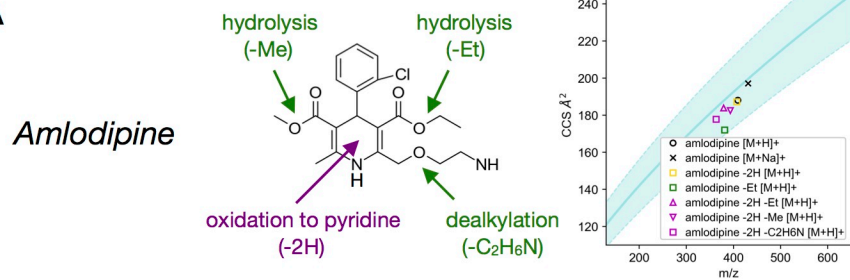

Expected metabolism for amlodipine<sup>5</sup> (left) and observed metabolites (right).

B

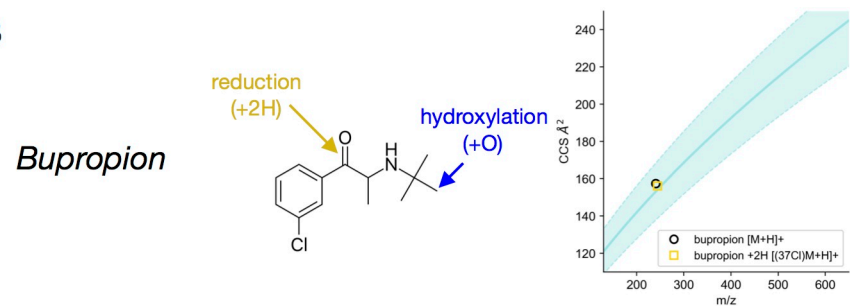

Expected metabolism for bupropion<sup>6</sup> (left) and observed metabolites (right).

C

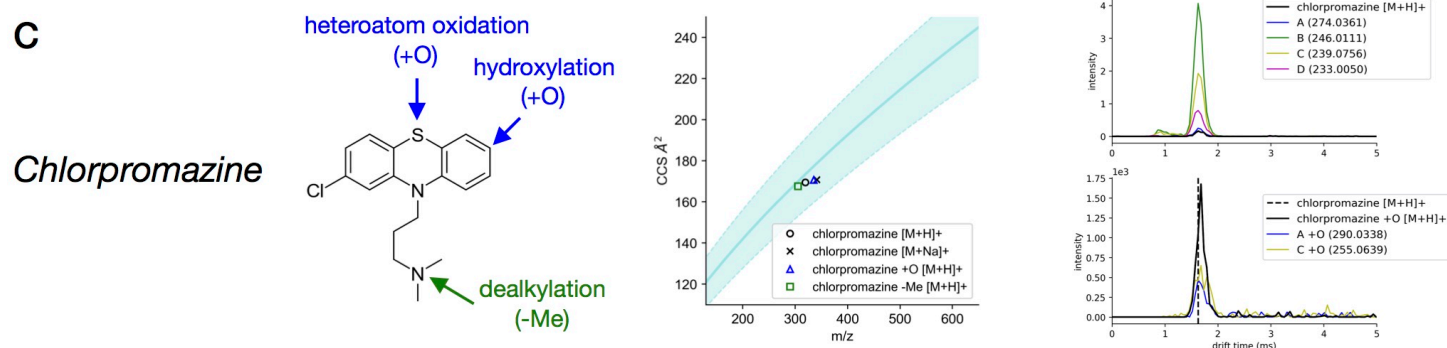

Expected metabolism for chlorpromazine<sup>7</sup> (left), observed metabolites (center), and drift time aligned fragmentation data (right).

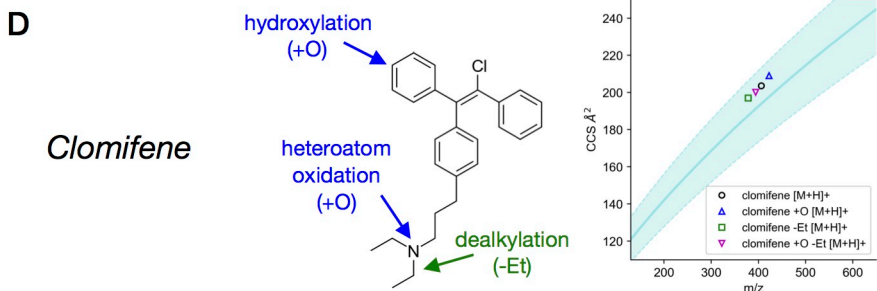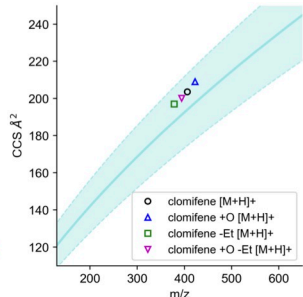

Expected metabolism for clomifene<sup>8</sup> (left) and observed metabolites (right).

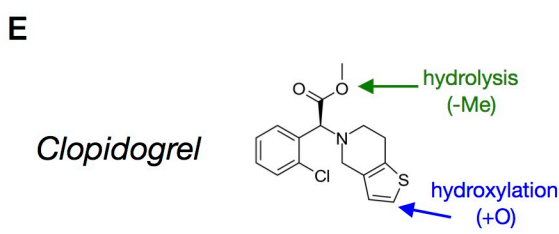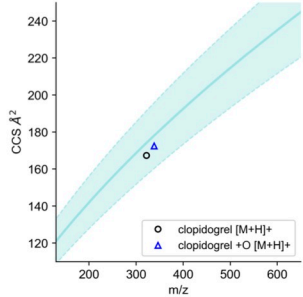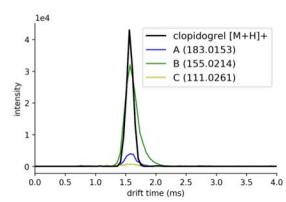

Expected metabolism for clopidogrel<sup>9</sup> (left), observed metabolites (center), and drift time aligned fragmentation data (right).

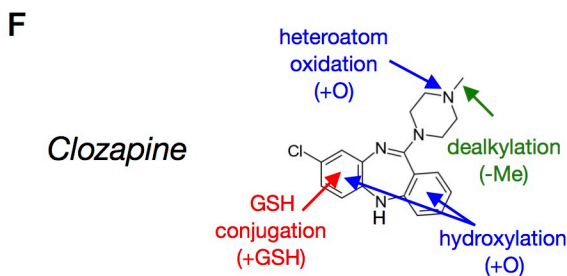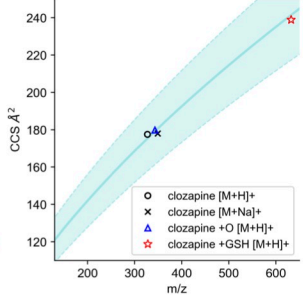

Expected metabolism for clozapine<sup>10</sup> (left) and observed metabolites (right).

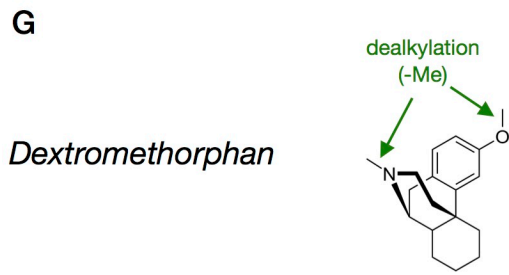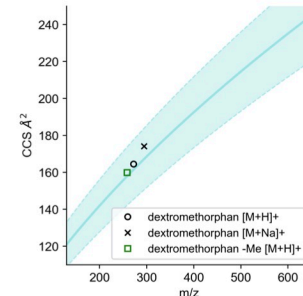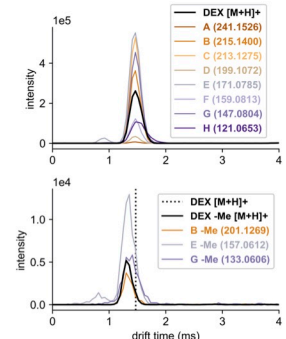

Expected metabolism for dextromethorphan<sup>11</sup> (left), observed metabolites (center), and drift time aligned fragmentation data (right).



H

Diclofenac

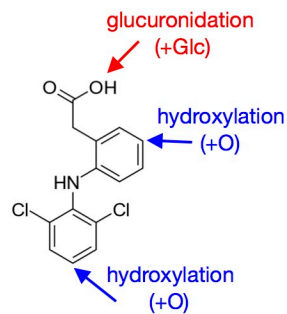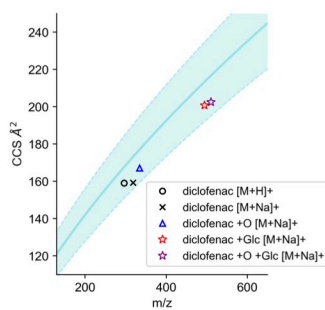

Expected metabolism for diclofenac<sup>12,13</sup> (left) and observed metabolites (right).

I

Progesterone

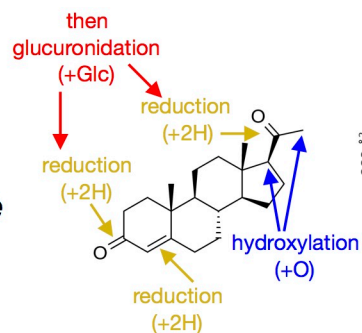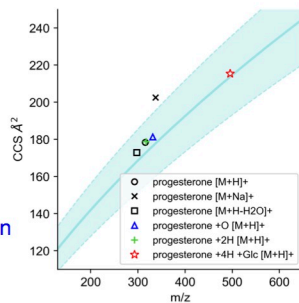

Expected metabolism for progesterone<sup>14</sup> (left) and observed metabolites (right).

J

Quercetin

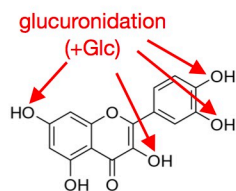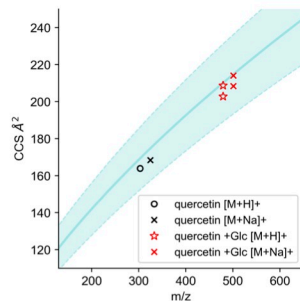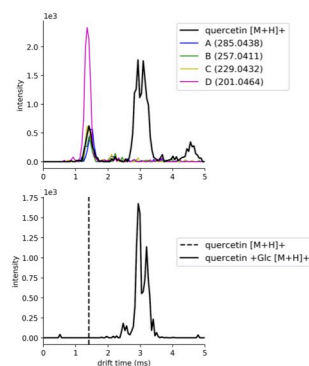

Expected metabolism for quercetin<sup>2</sup> (left), observed metabolites (center), and drift time aligned fragmentation data (right).

K

Quinidine

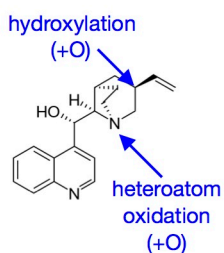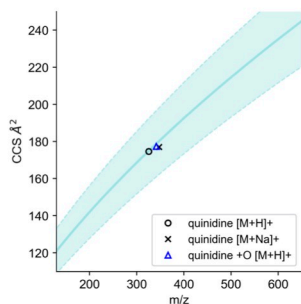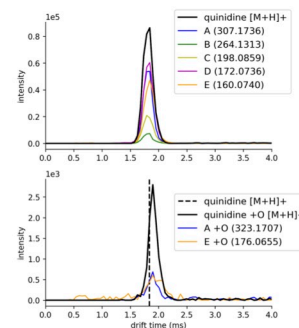

Expected metabolism for quinidine<sup>15</sup> (left), observed metabolites (center), and drift time aligned fragmentation data (right).

L

Terfenadine

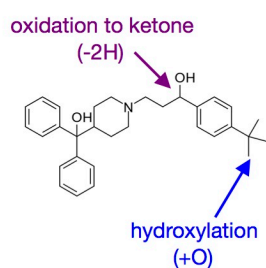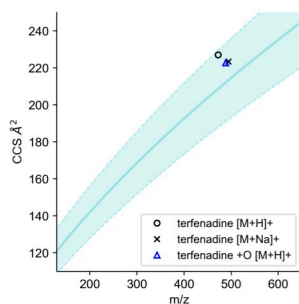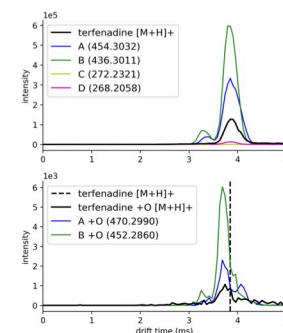

Expected metabolism for terfenadine<sup>16</sup> (left), observed metabolites (center), and drift time aligned fragmentation data (right).

M

Thioridazine

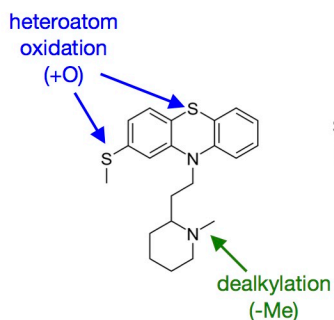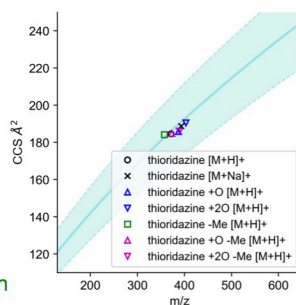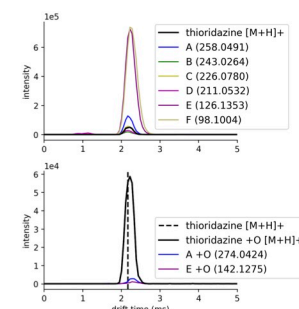

Expected metabolism for thioridazine<sup>17</sup> (left), observed metabolites (center), and drift time aligned fragmentation data (right).

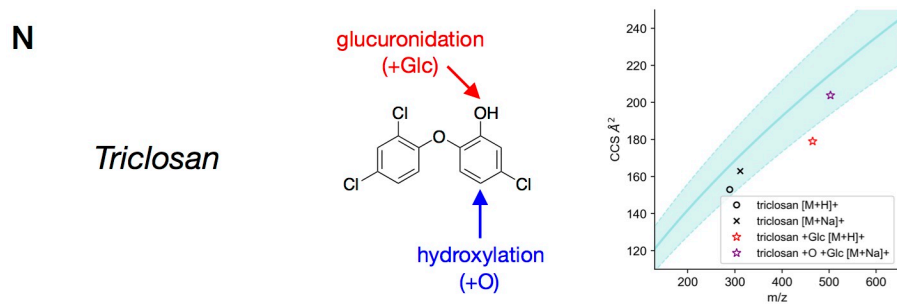

Expected metabolism for triclosan<sup>18</sup> (left) and observed metabolites (right).

### 3.4 – Figure S3 – Theoretical CCS of Sodiated Quercetin Glucuronide Isomers

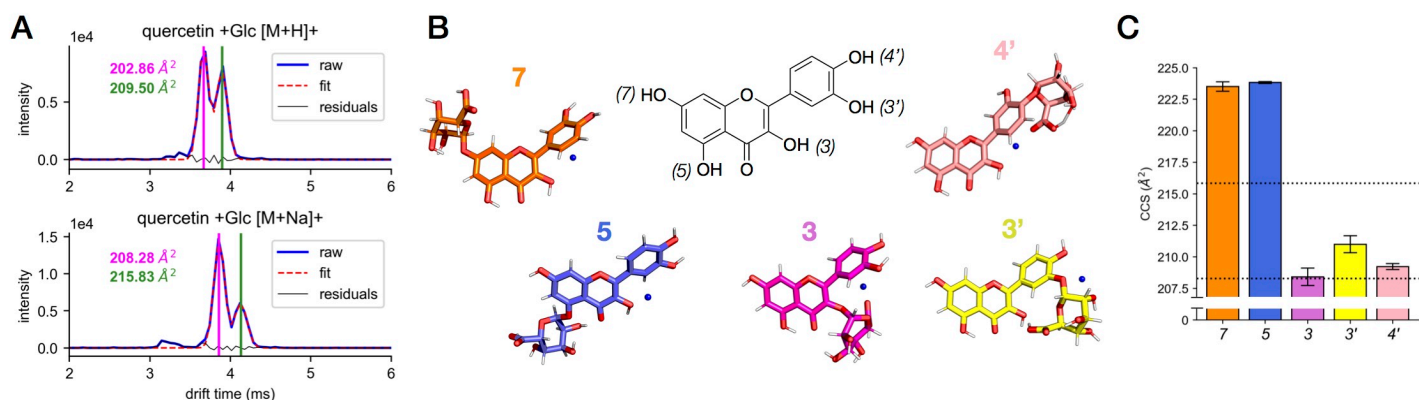

**A** Bimodal arrival time distributions (ATDs) for protonated (top) and sodiated (bottom) adducts of quercetin glucuronide. **B** Minimum energy structures for sodiated isomers of quercetin glucuronide. **C** Theoretical CCS of sodiated isomers of quercetin glucuronide, compared against experimental values (dotted lines).

## 4 – References

- (1) Kuca, K.; Marek, J.; Stodulka, P.; Musilek, K.; Hanusova, P.; Hrabnova, M.; Jun, D. *Molecules* **2007**, *12* (10), 2341–2347.
- (2) Boersma, M. G.; van der Woude, H.; Bogaards, J.; Boeren, S.; Vervoort, J.; Cnubben, N. H. P.; van Iersel, M. L. P. S.; van Bladeren, P. J.; Rietjens, I. M. C. M. *Chem. Res. Toxicol.* **2002**, *15* (5), 662–670.
- (3) Wandel, C.; Böcker, R.; Böhler, H.; Browne, A.; Rügheimer, E.; Martin, E. *British Journal of Anaesthesia* **1994**, *73* (5), 658–661.
- (4) Klieber, S.; Hugla, S.; Ngo, R.; Arabeyre-Fabre, C.; Meunier, V.; Sadoun, F.; Fedeli, O.; Rival, M.; Bourrie, M.; Guillou, F.; Maurel, P.; Fabre, G. *Drug Metab. Dispos.* **2008**, *36* (5), 851–862.
- (5) Zhu, Y.; Wang, F.; Li, Q.; Zhu, M.; Du, A.; Tang, W.; Chen, W. *Drug Metab. Dispos.* **2013**, *42* (2), 245–249.
- (6) Jefferson, J. W.; Pradko, J. F.; Muir, K. T. *Clinical Therapeutics* **2005**, *27* (11), 1685–1695.
- (7) Hartmann, F.; Gruenke, L. D.; Craig, J. C.; Bissell, D. M. *Drug Metabolism and Disposition* **1983**, *11* (3), 244–248.
- (8) Mürdter, T. E.; Kerb, R.; Turpeinen, M.; Schroth, W.; Ganchev, B.; Böhmer, G. M.; Igel, S.; Schaeffeler, E.; Zanger, U.; Brauch, H.; Schwab, M. *Human Molecular Genetics* **2011**, *21* (5), 1145–1154.
- (9) Clarke, T. A.; Waskell, L. A. *Drug Metabolism and Disposition* **2003**, *31* (1), 53–59.
- (10) Pirmohamed, M.; Williams, D.; Madden, S.; Templeton, E.; Park, B. K. *J Pharmacol Exp Ther* **1995**, *272* (3), 984–990.
- (11) Kerry, N. L.; Somogyi, A. A.; clinical, F. B. B. J. O.; 1994. *Br. J. Clin. Pharmacol.* **1994**, *38* (3), 243–248.
- (12) Kuehl, G. E.; Lampe, J. W.; Potter, J. D.; disposition, J. B. D. M. A.; 2005. *ASPET*
- (13) Bort, R.; Macé, K.; Boobis, A.; Gómez-Lechón, M.-J.; Pfeifer, A.; Castell, J. *Biochemical Pharmacology* **1999**, *58* (5), 787–796.
- (14) Aufrère, M. B.; Benson, H. *Journal of Pharmaceutical Sciences* **1976**, *65* (6), 783–800.
- (15) Nielsen, T. L.; Rasmussen, B. B.; Flinois, J.-P.; Beaune, P.; Brøsen, K. *J Pharmacol Exp Ther* **1999**, *289* (1), 31–37.
- (16) Jurima-Romet, M.; Crawford, K.; Cyr, T.; Inaba, T. *Drug Metabolism and Disposition* **1994**, *22* (6), 849–857.
- (17) Eap, C. B.; Guentert, T. W.; Loidl, M. S.; Stabl, M.; Koeb, L.; Powell, K.; Baumann, P. *Clinical Pharmacology & Therapeutics* **1996**, *59* (3), 322–331.
- (18) Wu, Y.; Chitranshi, P.; Loukotková, L.; da Costa, G. G.; Beland, F. A.; Zhang, J.; Fang, J.-L. *Archives of Toxicology* **2016**, *91* (6), 2405–2423.
